# Supplementary material
Source: PubMed Central journal article supplement (PMC3485892)
Supplement: CVI.00202-12_zcd999094563so1.pdf [file CVI.00202-12_zcd999094563so1.pdf]

**Table S1. Serogroup B *Neisseria meningitidis* strains used in this study.** List of bacterial strains by names, country and year of isolation, PorA genotype, the MLST sequence type (ST) and clonal complex (cc), and the genotype of the antigens fHbp, NHBA, NadA. The last column indicates whether the strain was used as a test strain (test), a reference strain for a given antigen to derive the RP by parallelism analysis (20), or both. Note: strain, M14993 originally included in the study, was exchanged in error for M14983 during the frozen stock preparation for some laboratories, and therefore removed from the analysis. A total of 18 strains was transferred to each participating laboratory: 15 as test strains, 2 as test and reference strains, 1 (NGH38) as reference strain only.

| Strain name | Country of isolation | Year of isolation | PorA VR1,VR2 | ST   | Clonal complex | fHbp var / subvar. | NHBA peptide | NadA allele | Ref (antigen) / test |
|-------------|----------------------|-------------------|--------------|------|----------------|--------------------|--------------|-------------|----------------------|
| 1000        | Russia               | 1988              | P1.5-1,10-4  | 20   | ST-18 cc       | 2.25               | 6            | No gene     | test                 |
| 2996        | U.K.                 | 1975              | P1.5,2       | 540  | ST-8 cc        | 2.16               | 20           | 3           | test                 |
| 5/99        | Norway               | 1999              | P1.5,2       | 1349 | ST-8 cc        | 2.23               | 20           | 2           | ref (NadA) + test    |
| 961-5945    | Australia            | 1996              | P1.21,16     | 153  | ST-8 cc        | 2.16               | 20           | 2           | test                 |
| 96217       | Canada               | 1996              | P1.5,2       | 153  | ST-8 cc        | 2.16               | 20           | 2           | test                 |
| BZ83        | The Netherlands      | 1984              | P1.5-2,10    | 34   | ST-32 cc       | 1.1                | 3            | 1           | test                 |
| H44/76      | Norway               | 1976              | P1.7,16      | 32   | ST-32 cc       | 1.1                | 3            | No gene     | ref (fHbp) + test    |
| M11003      | U.S.A.               | 2003              | P1.7-2,4     | 5097 | ST-41/44 cc    | 1.4                | 2            | No gene     | test                 |
| M11048      | U.S.A.               | 2003              | P1.5-1,2-2   | 60   | ST-60 cc       | 1.13               | 24           | No gene     | test                 |
| M01390      | U.S.A.               | 1995              | P1.7,4       | 41   | ST-41/44 cc    | 1.14               | 2            | No gene     | test                 |
| M15564      | U.S.A.               | 2006              | P1.7,16      | 32   | ST-32 cc       | 1.1                | 5            | 1           | test                 |
| M16019      | U.S.A.               | 2007              | P1.7,16      | 32   | ST-32 cc       | 1.1                | 5            | 1           | test                 |
| M04407      | U.S.A.               | 1996              | P1.15-1,19   | 6160 | ST-41/44 cc    | 2.19               | 2            | No gene     | test                 |
| M04458      | U.S.A.               | 1998              | P1.3,18-1    | 6161 | -              | 2.25               | 20           | 3           | test                 |
| MC58        | U.K.                 | 1985              | P1.7,16-2    | 74   | ST-32 cc       | 1.1                | 3            | 1           | test                 |
| NZ98/254    | New Zealand          | 1998              | P1.7-2,4     | 42   | ST-41/44 cc    | 1.14               | 2            | No gene     | test                 |
| M01-240149  | U.K.                 | 2001              | P1.7,4       | 41   | ST-41/44 cc    | 1.4                | 2            | No gene     | test                 |
| NGH38       | Norway               | 1988              | P1.3,-       | 36   | -              | 2.24               | 2            | No gene     | ref (NHBA)           |
