# Supplementary material
Source: PubMed Central journal article supplement (PMC3485892)
Supplement: CVI.00202-12_zcd999094563so2.pdf [file CVI.00202-12_zcd999094563so2.pdf]

**Table S2. Variances and coefficients of variations** estimated from the ANOVA models between-, within- and overall within- laboratory (adjusted for laboratory and strain), for fHbp-, NHBA- and NadA-MATS relative potencies.

|             |           | Between laboratory | Within laboratory |         |          |          |          |         |          | Overall within laboratory |
|-------------|-----------|--------------------|-------------------|---------|----------|----------|----------|---------|----------|---------------------------|
|             |           |                    | Lab A             | Lab B   | Lab C    | Lab D    | Lab E    | Lab F   | Lab G    |                           |
| <b>fHbp</b> | Variances | 0.00116            | 0.0045            | 0.01002 | 0.008204 | 0.005748 | 0.006883 | 0.01166 | 0.003999 | 0.007236                  |
|             | CV        | 7.85%              | 15.54%            | 23.36%  | 21.08%   | 17.59%   | 19.28%   | 25.25%  | 14.64%   | 19.78%                    |

  

|             |           | Between laboratory | Within laboratory |         |         |         |         |         |          | Overall within laboratory |
|-------------|-----------|--------------------|-------------------|---------|---------|---------|---------|---------|----------|---------------------------|
|             |           |                    | Lab A             | Lab B   | Lab C   | Lab D   | Lab E   | Lab F   | Lab G    |                           |
| <b>NHBA</b> | Variances | 0.00297            | 0.01065           | 0.01583 | 0.01436 | 0.02003 | 0.01262 | 0.02901 | 0.008194 | 0.01504                   |
|             | CV        | 12.60%             | 24.10%            | 29.59%  | 28.13%  | 33.47%  | 26.31%  | 40.78%  | 21.07%   | 28.81%                    |

  

|             |           | Between laboratory | Within laboratory |         |        |         |         |         |         | Overall within laboratory |
|-------------|-----------|--------------------|-------------------|---------|--------|---------|---------|---------|---------|---------------------------|
|             |           |                    | Lab A             | Lab B   | Lab C  | Lab D   | Lab E   | Lab F   | Lab G   |                           |
| <b>NadA</b> | Variances | 0.005074           | 0.03179           | 0.01683 | 0.0254 | 0.03499 | 0.02218 | 0.02532 | 0.02384 | 0.02576                   |
|             | CV        | 16.51%             | 42.85%            | 30.55%  | 37.97% | 45.15%  | 35.33%  | 37.90%  | 36.71%  | 38.25%                    |
