# Supplementary material
Source: PubMed Central journal article supplement (PMC3485892)
Supplement: CVI.00202-12_zcd999094563so3.pdf [file CVI.00202-12_zcd999094563so3.pdf]

**Table S3. Qualification criteria for new laboratories.** Statistics compiled from assays run by seven laboratories (A-G).

|             |                      | 5/99         | 961-5945     | 96217        | BZ83         | H44/76       | M11003       | M11048        | M1390        | M15564       | M16019       | M4458        | M01-240149   |
|-------------|----------------------|--------------|--------------|--------------|--------------|--------------|--------------|---------------|--------------|--------------|--------------|--------------|--------------|
| <b>fHbp</b> | Geo. Mean (Min, Max) | -            | -            | -            | 0.701, 1.257 | 0.907, 1.118 | 0.076, 0.116 | 0.012, 0.029  | 0.035, 0.075 | 0.913, 1.421 | 0.323, 0.615 | -            | 0.096, 0.167 |
|             | %CV (Min, Max)       | -            | -            | -            | 6.3, 23.6    | 4, 20.5      | 12.2, 34.9   | 7.5, 32.6     | 7, 33.1      | 11.2, 22.8   | 9.8, 26.9    | -            | 6.7, 21.7    |
|             | RP 95% pred. interv. | -            | -            | -            | 0.680, 1.385 | 0.759, 1.375 | 0.061, 0.161 | 0.014, 0.0350 | 0.026, 0.074 | 0.773, 1.538 | 0.311, 0.774 | -            | 0.090, 0.193 |
| <b>NHBA</b> | Geo. Mean (Min, Max) | 0.137, 0.232 | 0.189, 0.335 | 0.059, 0.182 | 0.265, 0.630 | 0.155, 0.425 | 0.492, 0.973 | 0.104, 0.414  | 0.687, 1.431 | 0.154, 0.635 | 0.135, 0.272 | 0.169, 0.454 | 0.452, 0.903 |
|             | %CV (Min, Max)       | 6.5, 31.2    | 6.1, 25.8    | 23.3, 59.2   | 1.9, 33.8    | 15.5, 40.2   | 11.7, 32     | 10.2, 32.5    | 6.1, 25.5    | 11.3, 41.7   | 8.7, 44.1    | 2.4, 35.5    | 3.6, 45.7    |
|             | RP 95% pred. interv. | 0.093, 0.283 | 0.145, 0.427 | 0.049, 0.256 | 0.262, 1.044 | 0.158, 0.589 | 0.495, 1.412 | 0.097, 0.405  | 0.587, 1.688 | 0.150, 0.662 | 0.109, 0.327 | 0.199, 0.685 | 0.364, 1.509 |
| <b>NadA</b> | Geo. Mean (Min, Max) | 0.944, 1.417 | 0.013, 0.072 | 0.181, 0.467 | -            | -            | -            | -             | -            | 0.001, 0.002 | 0.001, 0.002 | 0.056, 0.148 | -            |
|             | %CV (Min, Max)       | 3, 27.7      | 14.8, 52.5   | 13.2, 39.3   | -            | -            | -            | -             | -            | 0, 41.7      | 0, 50.6      | 10.1, 55.7   | -            |
|             | RP 95% pred. interv. | 0.646, 1.779 | 0.016, 0.091 | 0.168, 0.556 | -            | -            | -            | -             | -            | 0.001, 0.003 | 0.001, 0.004 | 0.037, 0.206 | -            |
