# Supplementary material
Source: PubMed Central journal article supplement (PMC3485892)

**Figure S1. Qualification data for Lab H.** For fHbp, NadA, and NHBA, plots for geometric means of RPs, CVs and RP prediction intervals are reported. Values determined in Lab H are shown as red dots and qualification criteria based on Lab A-G standardized results are shown as yellow bars. Small deviations from these criteria, compatible with the qualification protocol, are marked by rectangles. For graphical reasons strain M01-240149 is abbreviated here as “UK149”.

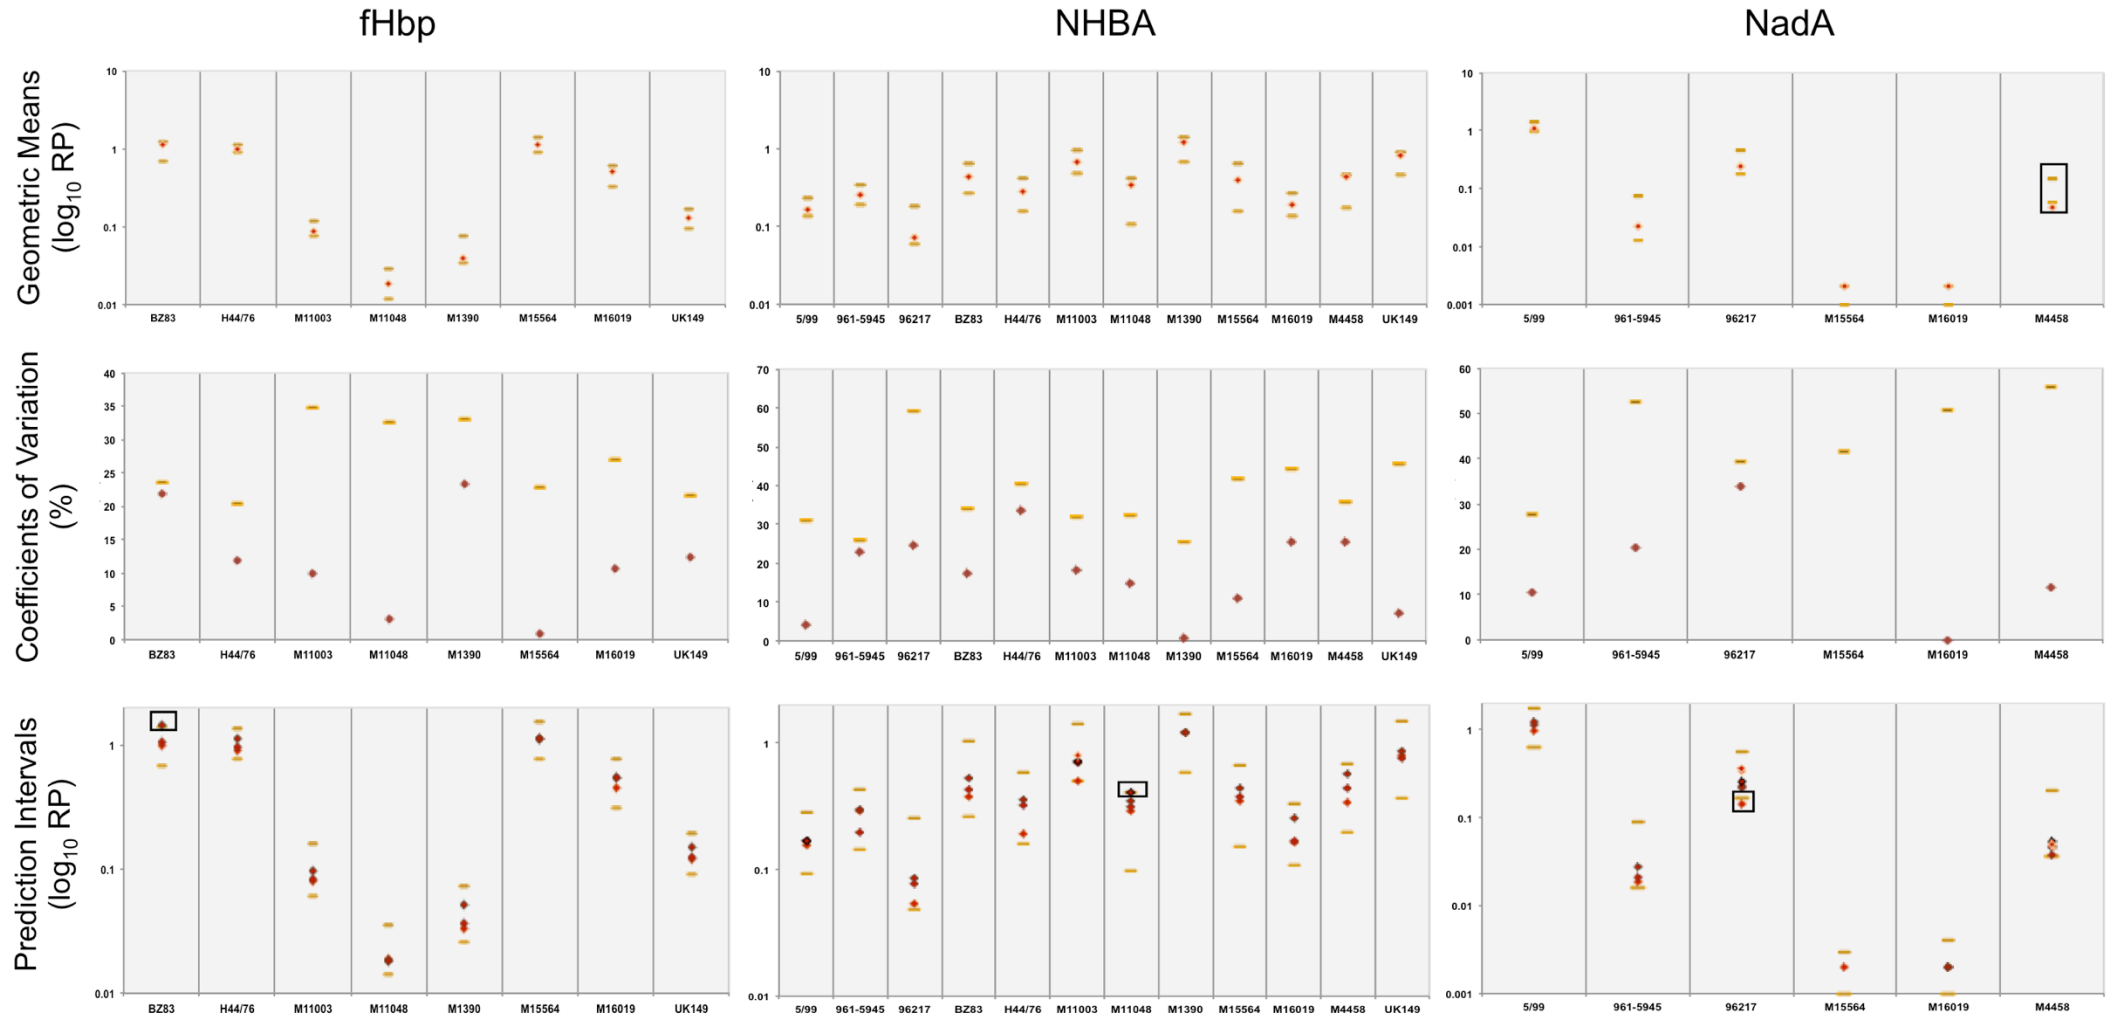

Supplement: CVI.00202-12_zcd999094563so4.pdf [file CVI.00202-12_zcd999094563so4.pdf]
